# Supplementary figures and images for: Evidence of Neuroplasticity With Robotic Hand Exoskeleton Study for Post-Stroke Rehabilitation: A Randomized Controlled Trial
Source: Research Square preprint supplement (doi:10.21203/rs.3.rs-67841/v2), 2020-11-11

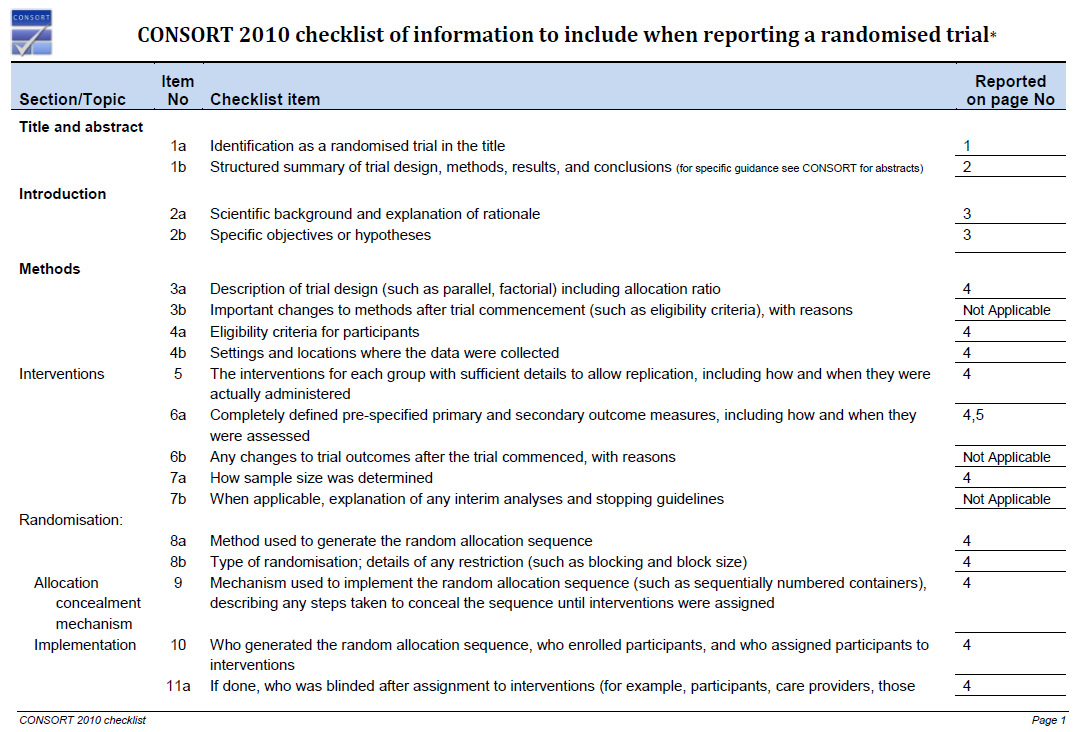


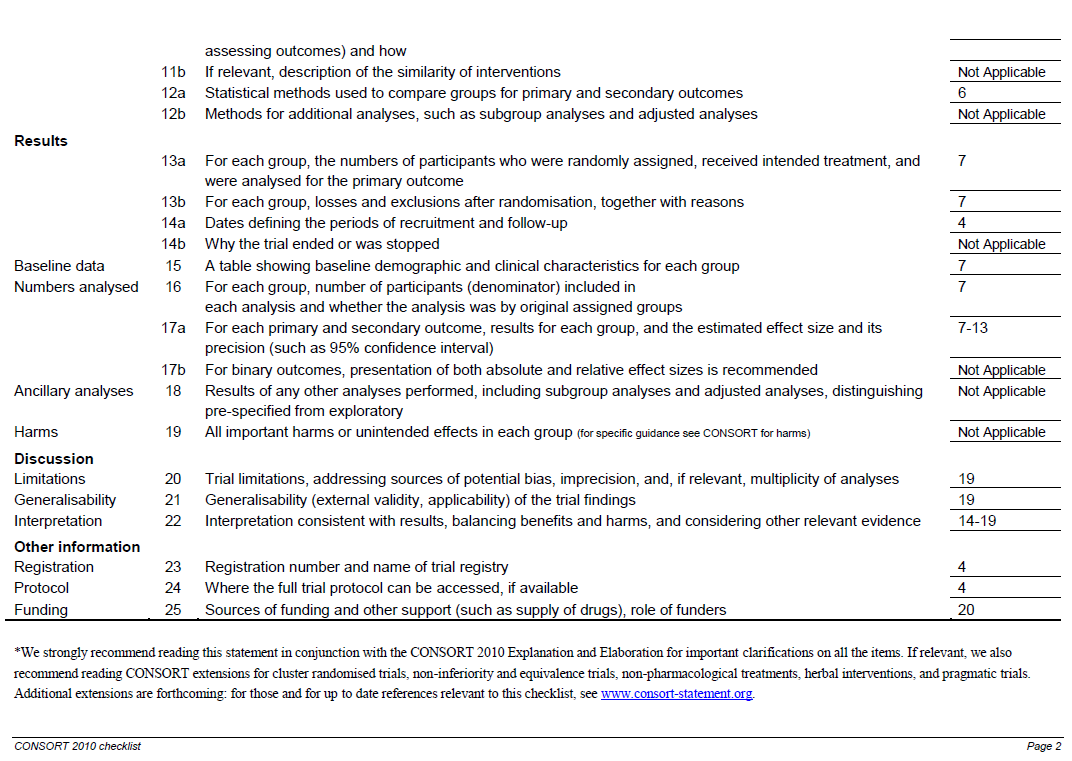

Supplement: Supplementary file 1 [file 60c234c87b9da45d6f8c630c.docx]
